# Supplementary material
Source: PubMed Central journal article supplement (PMC8332199)
Supplement: mmc1.pdf [file mmc1.pdf]

# THE LANCET

## Respiratory Medicine

### Supplementary appendix

This appendix formed part of the original submission and has been peer reviewed. We post it as supplied by the authors.

Supplement to: Aveyard P, Gao M, Lindson N, et al. Association between pre-existing respiratory disease and its treatment, and severe COVID-19: a population cohort study. *Lancet Respir Med* 2021; published online April 1. [http://dx.doi.org/10.1016/S2213-2600\(21\)00095-3](http://dx.doi.org/10.1016/S2213-2600(21)00095-3).

**Appendix Figure 1 Directed acyclic graphs of the associations between respiratory disease and severe COVID-19**

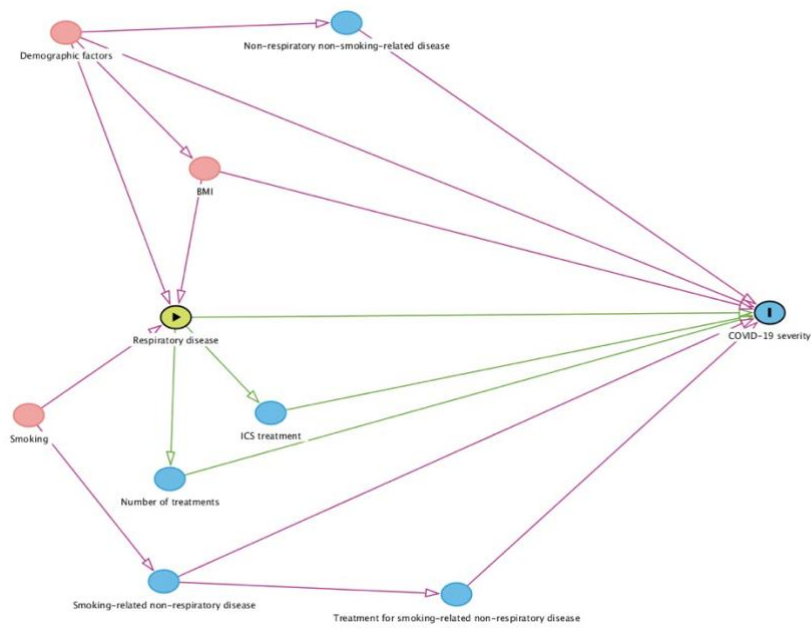

**Appendix Figure 2 Directed acyclic graph for the association between ICS use and severe COVID-19**

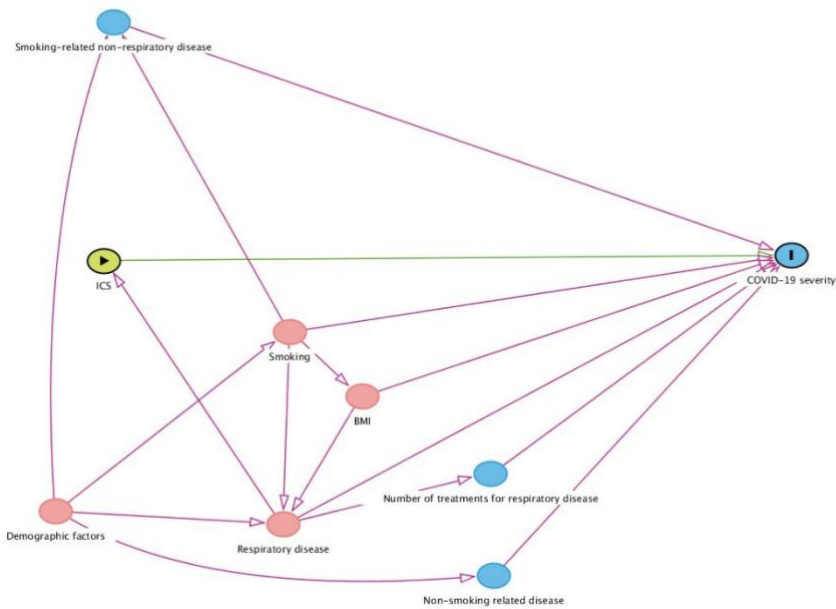

**Table 1 Appendix Characteristics of the population**

| Factor                                                            | Whole population<br>(n=8,256,161) | Number admitted to<br>hospital with COVID-19<br>(n=14,479) | Number admitted to ICU<br>with COVID-19 (n=1,542) | Number of Covid-19<br>deaths (n=5,956) |
|-------------------------------------------------------------------|-----------------------------------|------------------------------------------------------------|---------------------------------------------------|----------------------------------------|
| Respiratory disease                                               |                                   |                                                            |                                                   |                                        |
| COPD                                                              | 193520 (2.3%)                     | 1555 (10.7%)                                               | 59 (3.8%)                                         | 811 (13.6%)                            |
| Asthma                                                            | 1090028 (13.2%)                   | 2266 (15.7%)                                               | 213 (13.8%)                                       | 762 (12.8%)                            |
| Active asthma                                                     | 535126 (6.5%)                     | 1720 (11.9%)                                               | 165 (10.7%)                                       | 602 (10.1%)                            |
| Severe asthma                                                     | 385702 (4.7%)                     | 1369 (9.5%)                                                | 124 (8.0%)                                        | 476 (8.0%)                             |
| Bronchiectasis                                                    | 41271 (0.5%)                      | 319 (2.2%)                                                 | 18 (1.2%)                                         | 138 (2.3%)                             |
| Cystic fibrosis                                                   | 2081 (<1%)                        | 5 (<1%)                                                    | 0 (0.0%)                                          | 0 (0.0%)                               |
| Sarcoidosis                                                       | 17624 (0.2%)                      | 84 (0.6%)                                                  | 10 (0.6%)                                         | 32 (0.5%)                              |
| Extrinsic allergic alveolitis                                     | 2331 (<1%)                        | 16 (0.1%)                                                  | *                                                 | 8 (0.1%)                               |
| Idiopathic pulmonary fibrosis                                     | 7454 (0.1%)                       | 110 (0.8%)                                                 | 6 (0.4%)                                          | 62 (1.0%)                              |
| Other interstitial lung disease                                   | 5677 (0.1%)                       | 73 (0.5%)                                                  | *                                                 | 45 (0.8%)                              |
| Lung cancer                                                       | 10792 (0.1%)                      | 139 (1.0%)                                                 | *                                                 | 60 (1.0%)                              |
| Any respiratory disease                                           | 1271108 (15.4%)                   | 3696 (25.5%)                                               | 275 (17.8%)                                       | 1485 (24.9%)                           |
| Airways medication                                                |                                   |                                                            |                                                   |                                        |
| Regular inhaled corticosteroid use                                | 450784 (5.5%)                     | 1960 (13.5%)                                               | 166 (10.8%)                                       | 784 (13.2%)                            |
| Leukotriene receptor antagonists                                  | 41728 (0.5%)                      | 228 (1.6%)                                                 | 27 (1.8%)                                         | 69 (1.2%)                              |
| Short-acting beta agonist                                         | 495909 (6.0%)                     | 2357 (16.3%)                                               | 163 (10.6%)                                       | 988 (16.6%)                            |
| Anticholinergic                                                   | 93041 (1.1%)                      | 820 (5.7%)                                                 | 36 (2.3%)                                         | 400 (6.7%)                             |
| Theophylline/xanthine                                             | 8533 (0.1%)                       | 114 (0.8%)                                                 | *                                                 | 39 (0.7%)                              |
| Combined beta agonist and inhaled corticosteroid                  | 21976 (0.3%)                      | 156 (1.1%)                                                 | *                                                 | 89 (1.5%)                              |
| Combined long-acting beta agonist and inhaled corticosteroid      | 284933 (3.5%)                     | 1499 (10.4%)                                               | 119 (7.7%)                                        | 591 (9.9%)                             |
| Long-acting beta agonist                                          | 8793 (0.1%)                       | 62 (0.4%)                                                  | *                                                 | 26 (0.4%)                              |
| Combined long-acting anti-muscarinic and long-acting beta agonist | 25204 (0.3%)                      | 167 (1.2%)                                                 | 5 (0.3%)                                          | 92 (1.5%)                              |
| Inhaled corticosteroids alone                                     | 180076 (2.2%)                     | 565 (3.9%)                                                 | 59 (3.8%)                                         | 239 (4.0%)                             |
| Using 3 or more airways medications                               | 382265(4.6%)                      | 1918(13.3%)                                                | 139(9.0%)                                         | 796(13.4%)                             |
| Smoking status                                                    |                                   |                                                            |                                                   |                                        |
| Never smoked                                                      | 4718435 (57.2%)                   | 8133 (56.2%)                                               | 937 (60.8%)                                       | 3108 (52.2%)                           |
| Formerly smoked                                                   | 1748966 (21.2%)                   | 5006 (34.6%)                                               | 518 (33.6%)                                       | 2342 (39.3%)                           |
| Smokes 1-9 cigarettes/day                                         | 1097213 (13.3%)                   | 902 (6.2%)                                                 | 60 (3.9%)                                         | 295 (5.0%)                             |

|                             |                 |              |              |              |
|-----------------------------|-----------------|--------------|--------------|--------------|
| Smokes 10-19 cigarettes/day | 208767 (2.5%)   | 120 (0.8%)   | 5 (0.3%)     | 40 (0.7%)    |
| Smokes ≥20 cigarettes/day   | 96153 (1.2%)    | 92 (0.6%)    | 7 (0.5%)     | 32 (0.5%)    |
| Unknown smoking status      | 386627 (4.7%)   | 226 (1.6%)   | 15 (1.0%)    | 139 (2.3%)   |
| Age                         |                 |              |              |              |
| Mean age (SD)               | 48.2 (18.6)     | 69.9 (17.7)  | 59.5 (12.5)  | 80.2 (12.0)  |
| Age group                   |                 |              |              |              |
| 20-39                       | 3171742 (38.4%) | 1029 (7.1%)  | 107 (6.9%)   | 40 (0.7%)    |
| 40-59                       | 2752758 (33.3%) | 2938 (20.3%) | 621 (40.3%)  | 366 (6.1%)   |
| 60-79                       | 1823544 (22.1%) | 5139 (35.5%) | 766 (49.7%)  | 1887 (31.7%) |
| 80-100                      | 508117 (6.2%)   | 5373 (37.1%) | 48 (3.1%)    | 3663 (61.5%) |
| Sex- men (%)                | 4111200 (49.8%) | 8038 (55.5%) | 1132 (73.4%) | 3423 (57.5%) |
| Ethnicity as recorded       |                 |              |              |              |
| White                       | 5359536 (64.9%) | 9193 (63.5%) | 755 (49.0%)  | 4019 (67.5%) |
| Indian                      | 227767 (2.8%)   | 534 (3.7%)   | 81 (5.3%)    | 164 (2.8%)   |
| Pakistani                   | 148399 (1.8%)   | 323 (2.2%)   | 52 (3.4%)    | 93 (1.6%)    |
| Bangladeshi                 | 111077 (1.3%)   | 223 (1.5%)   | 47 (3.0%)    | 91 (1.5%)    |
| Other Asian                 | 145010 (1.8%)   | 319 (2.2%)   | 83 (5.4%)    | 76 (1.3%)    |
| Caribbean                   | 93339 (1.1%)    | 529 (3.7%)   | 63 (4.1%)    | 217 (3.6%)   |
| Black African               | 198427 (2.4%)   | 594 (4.1%)   | 129 (8.4%)   | 156 (2.6%)   |
| Chinese                     | 82598 (1.0%)    | 64 (0.4%)    | 14 (0.9%)    | 25 (0.4%)    |
| Other                       | 306060 (3.7%)   | 568 (3.9%)   | 113 (7.3%)   | 137 (2.3%)   |
| Not recorded                | 1583948 (19.2%) | 2132 (14.7%) | 205 (13.3%)  | 978 (16.4%)  |
| Ethnicity as analysed       |                 |              |              |              |
| White                       | 5359536 (64.9%) | 9193 (63.5%) | 755 (49.0%)  | 4019 (67.5%) |
| Asian                       | 632253 (7.7%)   | 1399 (9.7%)  | 263 (17.1%)  | 424 (7.1%)   |
| Black                       | 291766 (3.5%)   | 1123 (7.8%)  | 192 (12.5%)  | 373 (6.3%)   |
| Chinese                     | 82598 (1.0%)    | 64 (0.4%)    | 14 (0.9%)    | 25 (0.4%)    |
| Others/not recorded         | 1890008 (22.9%) | 2700 (18.6%) | 318 (20.6%)  | 1115 (18.7%) |
| Townsend deprivation score  |                 |              |              |              |
| 1 (most affluent)           | 1881317 (22.9%) | 2777 (19.2%) | 246 (16.0%)  | 1235 (20.8%) |
| 2                           | 1821068 (22.2%) | 2850 (19.7%) | 265 (17.2%)  | 1170 (19.7%) |
| 3                           | 1629714 (19.8%) | 2957 (20.5%) | 306 (19.9%)  | 1335 (22.5%) |
| 4                           | 1483531 (18.1%) | 2824 (19.6%) | 304 (19.8%)  | 1084 (18.2%) |
| 5 (most deprived)           | 1402402 (17.1%) | 3035 (21.0%) | 417 (27.1%)  | 1121 (18.9%) |
| Not recorded                | 38129 (0.5%)    | 36 (0.2%)    | *            | 11 (0.2%)    |

|                              |                 |              |             |              |
|------------------------------|-----------------|--------------|-------------|--------------|
| Region                       |                 |              |             |              |
| East Midlands                | 220879 (2.7%)   | 216 (1.5%)   | 15 (1.0%)   | 93 (1.6%)    |
| East of England              | 296231 (3.6%)   | 490 (3.4%)   | 45 (2.9%)   | 209 (3.5%)   |
| London                       | 2059744 (24.9%) | 4963 (34.3%) | 693 (44.9%) | 1770 (29.7%) |
| North East                   | 195156 (2.4%)   | 321 (2.2%)   | 28 (1.8%)   | 109 (1.8%)   |
| North West                   | 1470043 (17.8%) | 2773 (19.2%) | 258 (16.7%) | 1268 (21.3%) |
| South Central                | 1104630 (13.4%) | 1720 (11.9%) | 148 (9.6%)  | 800 (13.4%)  |
| South East                   | 925796 (11.2%)  | 1298 (9.0%)  | 141 (9.1%)  | 577 (9.7%)   |
| South West                   | 900553 (10.9%)  | 797 (5.5%)   | 68 (4.4%)   | 299 (5.0%)   |
| West Midlands                | 777225 (9.4%)   | 1514 (10.5%) | 111 (7.2%)  | 654 (11.0%)  |
| Yorkshire & Humber           | 305904 (3.7%)   | 387 (2.7%)   | 35 (2.3%)   | 177 (3.0%)   |
| Hypertension                 | 1407799 (17.1%) | 2633 (18.2%) | 65 (4.2%)   | 2222 (37.3%) |
| Coronary heart disease       | 292839 (3.5%)   | 2414 (16.7%) | 128 (8.3%)  | 1373 (23.1%) |
| Stroke                       | 177763 (2.2%)   | 1822 (12.6%) | 51 (3.3%)   | 1144 (19.2%) |
| Atrial fibrillation          | 201250 (2.4%)   | 1750 (12.1%) | 50 (3.2%)   | 1101 (18.5%) |
| Type 2 diabetes              | 555416 (6.7%)   | 1993 (13.8%) | 50 (3.2%)   | 1100 (18.5%) |
| Type 1 diabetes              | 45947 (0.6%)    | 3537 (24.4%) | 174 (11.3%) | 1962 (32.9%) |
| Chronic kidney disease       | 336880 (4.1%)   | 4237 (29.3%) | 480 (31.1%) | 1935 (32.5%) |
| Chronic liver disease        | 47141 (0.6%)    | 272 (1.9%)   | 30 (1.9%)   | 85 (1.4%)    |
| Chronic neurological disease | 256538 (3.1%)   | 286 (2.0%)   | 16 (1.0%)   | 98 (1.6%)    |
| BMI groups                   |                 |              |             |              |
| BMI<18.5                     | 220706 (2.7%)   | 361 (2.5%)   | 5 (0.3%)    | 274 (4.6%)   |
| BMI 18.5-24.9                | 2742969 (33.2%) | 3660 (25.3%) | 198 (12.8%) | 1869 (31.4%) |
| BMI 25-29.9                  | 2315214 (28.0%) | 4602 (31.8%) | 491 (31.8%) | 1754 (29.4%) |
| BMI 30-34.9                  | 1076005 (13.0%) | 2823 (19.5%) | 407 (26.4%) | 965 (16.2%)  |
| BMI 35-39.9                  | 406529 (4.9%)   | 1276 (8.8%)  | 222 (14.4%) | 384 (6.4%)   |
| BMI ≥40                      | 203717 (2.5%)   | 793 (5.5%)   | 135 (8.8%)  | 234 (3.9%)   |
| BMI not recorded             | 1291021 (15.6%) | 964 (6.7%)   | 84 (5.4%)   | 476 (8.0%)   |

\* Data not presented as fewer than 5 people had this outcome

**Table 2 Appendix Characteristics of the population by ICS use, asthma and lung disease combined**

| Factor                                                            | People using ICS (n=450784) | People with asthma(n=1090028) | People with COPD(n=193520) | People with all other respiratory disease (n=30710) |
|-------------------------------------------------------------------|-----------------------------|-------------------------------|----------------------------|-----------------------------------------------------|
| Airways medication                                                |                             |                               |                            |                                                     |
| Leukotriene receptor antagonists                                  | 35232 (7.8%)                | 37716 (3.5%)                  | 6696 (3.5%)                | 497 (1.6%)                                          |
| Short-acting beta agonist                                         | 325965 (72.3%)              | 345304 (31.7%)                | 127408 (65.8%)             | 5534 (18.0%)                                        |
| Anticholinergic                                                   | 68472 (15.2%)               | 38014 (3.5%)                  | 75310 (38.9%)              | 1955 (6.4%)                                         |
| Theophylline/xanthine                                             | 6550 (1.5%)                 | 6029 (0.6%)                   | 5557 (2.9%)                | 150 (0.5%)                                          |
| Combined beta agonist and inhaled corticosteroid                  | 2904 (0.6%)                 | 3295 (0.3%)                   | 20055 (10.4%)              | 528 (1.7%)                                          |
| Combined long-acting beta agonist and inhaled corticosteroid      | 284933 (63.2%)              | 229517 (21.1%)                | 78322 (40.5%)              | 3852 (12.5%)                                        |
| Long-acting beta agonist                                          | 5452 (1.2%)                 | 5123 (0.5%)                   | 4064 (2.1%)                | 118 (0.4%)                                          |
| Combined long-acting anti-muscarinic and long-acting beta agonist | 6193 (1.4%)                 | 3605 (0.3%)                   | 23194 (12.0%)              | 584 (1.9%)                                          |
| Inhaled corticosteroids alone                                     | 180076 (39.9%)              | 149465 (13.7%)                | 17522 (9.1%)               | 1563 (5.1%)                                         |
| Using 3 or more airways medications                               | 342982(75.6%)               | 288196(26.5%)                 | 113446(58.7%)              | 4558(14.9%)                                         |
| Smoking status                                                    |                             |                               |                            |                                                     |
| Never smoked                                                      | 222224 (49.3%)              | 624797 (57.3%)                | 23935 (12.4%)              | 17406 (56.7%)                                       |
| Formerly smoked                                                   | 147629 (32.7%)              | 257566 (23.6%)                | 104638 (54.1%)             | 10497 (34.2%)                                       |
| Smokes 1-9 cigarettes/day                                         | 62939 (14.0%)               | 153208 (14.1%)                | 49545 (25.6%)              | 2123 (6.9%)                                         |
| Smokes 10-19 cigarettes/day                                       | 10585 (2.3%)                | 27515 (2.5%)                  | 8494 (4.4%)                | 347 (1.1%)                                          |
| Smokes ≥20 cigarettes/day                                         | 6631 (1.5%)                 | 12650 (1.2%)                  | 6736 (3.5%)                | 207 (0.7%)                                          |
| Unknown smoking status                                            | 776 (0.2%)                  | 14292 (1.3%)                  | 172 (0.1%)                 | 130 (0.4%)                                          |
| Age                                                               |                             |                               |                            |                                                     |
| Mean age (SD)                                                     | 57.55 (18.03)               | 46.65 (18.34)                 | 70.96 (11.44)              | 66.11 (14.96)                                       |
| Age group                                                         |                             |                               |                            |                                                     |
| 20-39                                                             | 84077 (18.7%)               | 459751 (42.2%)                | 1105 (0.6%)                | 1543 (5.0%)                                         |
| 40-59                                                             | 148307 (32.9%)              | 352853 (32.4%)                | 31175 (16.1%)              | 8607 (28.0%)                                        |
| 60-79                                                             | 167010 (37.0%)              | 218881 (20.1%)                | 115046 (59.4%)             | 14175 (46.2%)                                       |
| 80-100                                                            | 51390 (11.4%)               | 58543 (5.4%)                  | 46194 (23.9%)              | 6385 (20.8%)                                        |
| Sex- men (%)                                                      | 190411 (42.2%)              | 518531 (47.6%)                | 100844 (52.1%)             | 16203 (52.8%)                                       |
| Ethnicity as recorded                                             |                             |                               |                            |                                                     |
| White                                                             | 343711 (76.2%)              | 784083 (71.9%)                | 161376 (83.4%)             | 21268 (69.3%)                                       |
| Indian                                                            | 9346 (2.1%)                 | 23143 (2.1%)                  | 1428 (0.7%)                | 993 (3.2%)                                          |

|                            |                |                |                |               |
|----------------------------|----------------|----------------|----------------|---------------|
| Pakistani                  | 8993 (2.0%)    | 19427 (1.8%)   | 1236 (0.6%)    | 573 (1.9%)    |
| Bangladeshi                | 5462 (1.2%)    | 12409 (1.1%)   | 1015 (0.5%)    | 300 (1.0%)    |
| Other Asian                | 5320 (1.2%)    | 13035 (1.2%)   | 784 (0.4%)     | 394 (1.3%)    |
| Caribbean                  | 5344 (1.2%)    | 14158 (1.3%)   | 1309 (0.7%)    | 840 (2.7%)    |
| Black African              | 4863 (1.1%)    | 14194 (1.3%)   | 591 (0.3%)     | 729 (2.4%)    |
| Chinese                    | 963 (0.2%)     | 3503 (0.3%)    | 178 (0.1%)     | 41 (0.1%)     |
| Other                      | 9830 (2.2%)    | 31443 (2.9%)   | 1743 (0.9%)    | 946 (3.1%)    |
| Not recorded               | 56952 (12.6%)  | 174633 (16.0%) | 23860 (12.3%)  | 4626 (15.1%)  |
| Ethnicity as analysed      |                |                |                |               |
| White                      | 343711 (76.2%) | 784083 (71.9%) | 161376 (83.4%) | 21268 (69.3%) |
| Asian                      | 29121 (6.5%)   | 68014 (6.2%)   | 4463 (2.3%)    | 2260 (7.4%)   |
| Black                      | 10207 (2.3%)   | 28352 (2.6%)   | 1900 (1.0%)    | 1569 (5.1%)   |
| Chinese                    | 963 (0.2%)     | 3503 (0.3%)    | 178 (0.1%)     | 41 (0.1%)     |
| Others/not recorded        | 66782 (14.8%)  | 206076 (18.9%) | 25603 (13.2%)  | 5572 (18.1%)  |
| Townsend deprivation score |                |                |                |               |
| 1 (most affluent)          | 108162 (24.0%) | 259097 (23.8%) | 36437 (18.8%)  | 8735 (28.4%)  |
| 2                          | 105183 (23.3%) | 253449 (23.3%) | 41488 (21.4%)  | 7562 (24.6%)  |
| 3                          | 93628 (20.8%)  | 225539 (20.7%) | 43088 (22.3%)  | 5961 (19.4%)  |
| 4                          | 81210 (18.0%)  | 192184 (17.6%) | 40193 (20.8%)  | 4743 (15.4%)  |
| 5 (most deprived)          | 61014 (13.5%)  | 154828 (14.2%) | 31946 (16.5%)  | 3638 (11.8%)  |
| Not recorded               | 1587 (0.4%)    | 4931 (0.5%)    | 368 (0.2%)     | 71 (0.2%)     |
| Region                     |                |                |                |               |
| East Midlands              | 9741 (2.2%)    | 27906 (2.6%)   | 3780 (2.0%)    | 601 (2.0%)    |
| East of England            | 17295 (3.8%)   | 42244 (3.9%)   | 6781 (3.5%)    | 1286 (4.2%)   |
| London                     | 79010 (17.5%)  | 214852 (19.7%) | 30647 (15.8%)  | 6317 (20.6%)  |
| North East                 | 11885 (2.6%)   | 27984 (2.6%)   | 7104 (3.7%)    | 624 (2.0%)    |
| North West                 | 102435 (22.7%) | 219030 (20.1%) | 49069 (25.4%)  | 5955 (19.4%)  |
| South Central              | 60539 (13.4%)  | 156435 (14.4%) | 22460 (11.6%)  | 4383 (14.3%)  |
| South East                 | 54050 (12.0%)  | 118760 (10.9%) | 23270 (12.0%)  | 3357 (10.9%)  |
| South West                 | 50334 (11.2%)  | 134231 (12.3%) | 22912 (11.8%)  | 3788 (12.3%)  |
| West Midlands              | 48730 (10.8%)  | 107417 (9.9%)  | 19561 (10.1%)  | 3320 (10.8%)  |
| Yorkshire & Humber         | 16765 (3.7%)   | 41169 (3.8%)   | 7936 (4.1%)    | 1079 (3.5%)   |
| Hypertension               | 143355 (31.8%) | 191752 (17.6%) | 90448 (46.7%)  | 12642 (41.2%) |
| Coronary heart disease     | 35671 (7.9%)   | 41125 (3.8%)   | 34506 (17.8%)  | 4085 (13.3%)  |
| Stroke                     | 19790 (4.4%)   | 24165 (2.2%)   | 18163 (9.4%)   | 2178 (7.1%)   |

|                              |                |                |               |               |
|------------------------------|----------------|----------------|---------------|---------------|
| Atrial fibrillation          | 22760 (5.0%)   | 26814 (2.5%)   | 20832 (10.8%) | 2733 (8.9%)   |
| Type 2 diabetes              | 59047 (13.1%)  | 82278 (7.5%)   | 37718 (19.5%) | 5907 (19.2%)  |
| Type 1 diabetes              | 37308 (8.3%)   | 45556 (4.2%)   | 31029 (16.0%) | 4988 (16.2%)  |
| Chronic kidney disease       | 3309 (0.7%)    | 6907 (0.6%)    | 1327 (0.7%)   | 338 (1.1%)    |
| Chronic liver disease        | 5265 (1.2%)    | 7422 (0.7%)    | 4335 (2.2%)   | 556 (1.8%)    |
| Chronic neurological disease | 21881 (4.9%)   | 38884 (3.6%)   | 14675 (7.6%)  | 1948 (6.3%)   |
| BMI groups                   |                |                |               |               |
| BMI<18.5                     | 9553 (2.1%)    | 32821 (3.0%)   | 9062 (4.7%)   | 537 (1.7%)    |
| BMI 18.5-24.9                | 125172 (27.8%) | 350914 (32.2%) | 61518 (31.8%) | 8299 (27.0%)  |
| BMI 25-29.9                  | 145554 (32.3%) | 315370 (28.9%) | 61169 (31.6%) | 10977 (35.7%) |
| BMI 30-34.9                  | 88949 (19.7%)  | 169695 (15.6%) | 35865 (18.5%) | 6022 (19.6%)  |
| BMI 35-39.9                  | 41383 (9.2%)   | 76970 (7.1%)   | 14746 (7.6%)  | 2356 (7.7%)   |
| BMI ≥40                      | 26849 (6.0%)   | 47464 (4.4%)   | 7667 (4.0%)   | 1178 (3.8%)   |
| BMI not recorded             | 13324 (3.0%)   | 96794 (8.9%)   | 3493 (1.8%)   | 1341 (4.4%)   |

\* Data not presented as fewer than 5 people had this outcome
